# Supplementary material for: Global Analysis of Genetic, Epigenetic and Transcriptional Polymorphisms in Arabidopsis thaliana Using Whole Genome Tiling Arrays
Source: PLoS Genet. 2008 Mar 21;4(3):e1000032. doi: 10.1371/journal.pgen.1000032 (PMC2265482; doi:10.1371/journal.pgen.1000032)
Supplement: Figure S6 — Diagram of each Effect in the (Additive+Dominant+Maternal) × Enzyme Full Model. F1c: F1 hybrids with Col-mother; F1v: F1 hybrids with Van-mother. Additive effect indicates hybridization intensity difference between parents across enzyme treatments, suggesting SFP. Dominant effect indicates hybridization intensity difference between the mid-parent (dashed line) and the average of reciprocal F1 hybrids across enzyme treatments. Maternal effect indicates hybridization intensity difference between reciprocal F1 hybrids across enzyme treatments. Enzyme effect with greater HpaII signal indicates constitutive CG methylation; that with greater MspI signal was likely due to normalization. Additive × enzyme effect indicates differential CG methylation between parents; dominant × enzyme effect indicates differential CG methylation between mid-parents and average of F1 hybrids; maternal × enzyme effect indicates differential CG methylation between reciprocal F1 hybrids. (0.10 MB PDF) [file pgen.1000032.s006.pdf]

## Full model:

Intensity  $\sim$  add + dom + mat + enz + add x enz + dom x enz + mat x enz +  $\varepsilon$

## Contrast setting in the full model:

|                 | add | dom | mat | enz |
|-----------------|-----|-----|-----|-----|
| Col <i>Hpal</i> | 1   | 0   | 0   | 1   |
| Col <i>Mspl</i> | 1   | 0   | 0   | -1  |
| Van <i>Hpal</i> | -1  | 0   | 0   | 1   |
| Van <i>Mspl</i> | -1  | 0   | 0   | -1  |
| F1c <i>Hpal</i> | 0   | 1   | 1   | 1   |
| F1c <i>Mspl</i> | 0   | 1   | 1   | -1  |
| F1v <i>Hpal</i> | 0   | 1   | -1  | 1   |
| F1v <i>Mspl</i> | 0   | 1   | -1  | -1  |

Add: additive effect; dom: dominant effect; mat: maternal effect; enz: enzyme effect;  $\varepsilon$ : random error.

### Additive effect +

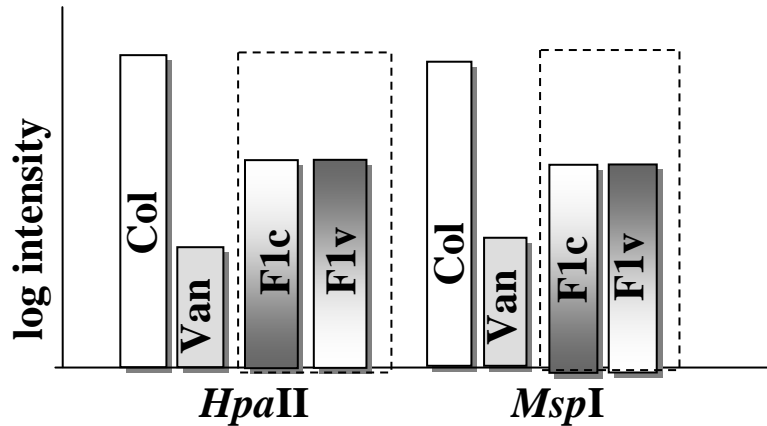

**SFP; Col has greater signal than Van.**

### Additive effect -

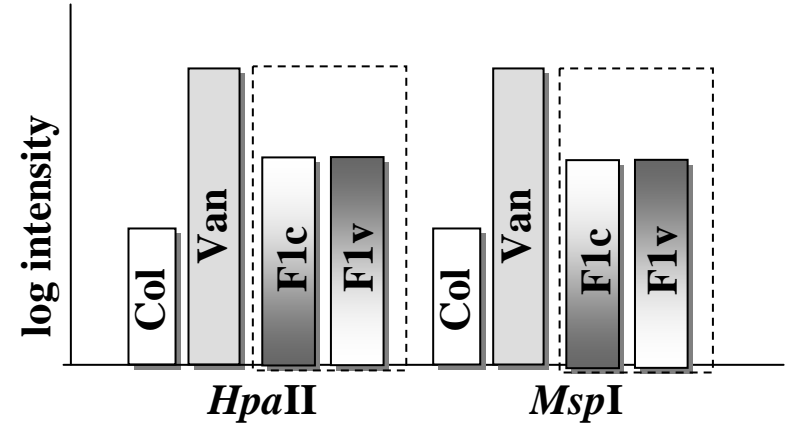

**Van duplication or deletion in Col; Van has greater signal than Col**

Additive effect describes intensity difference between parent strains across enzyme treatments.

### Dominant effect +

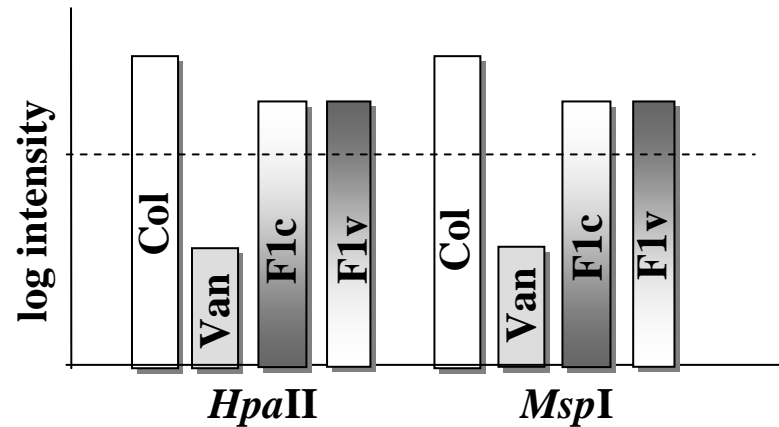

**Increased F1 hybridization  
compared with expected from  
mid-parent**

### Dominant effect -

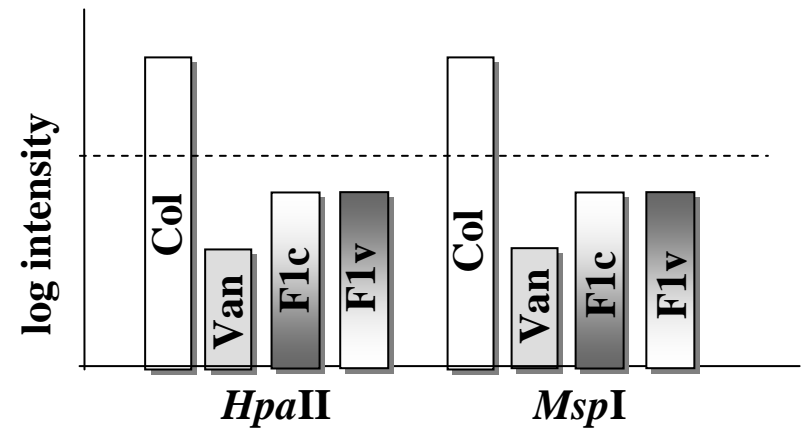

**Reduced F1 hybridization  
compared with expected from  
mid-parent**

Dominant effect describes intensity difference between mid-parent (average of parents; dashed line) and average of F1 hybrids across enzyme treatments.

### Maternal effect +

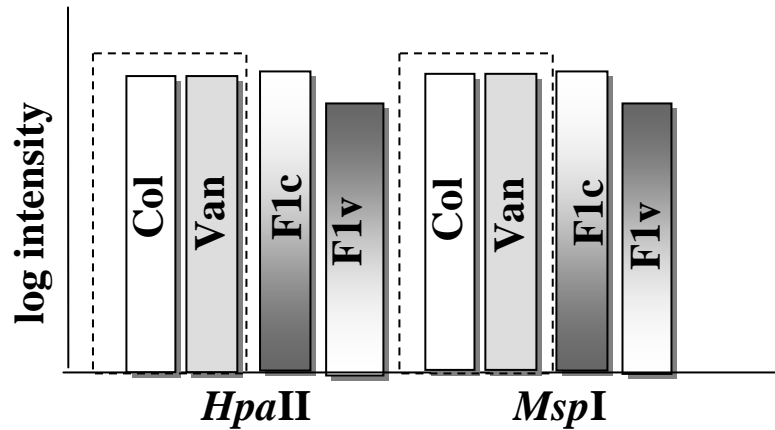

**Random variation; Col-mother  
F1 with greater signal than  
Van-mother F1**

### Maternal effect -

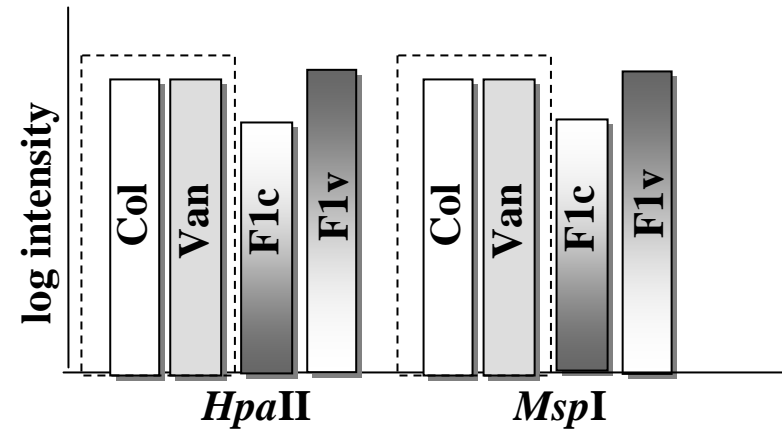

**Random variation; Van-mother  
F1 with greater signal than Col-  
mother F1**

Maternal effect describes intensity difference between reciprocal F1 hybrids across enzyme treatments.

**Enzyme effect +**

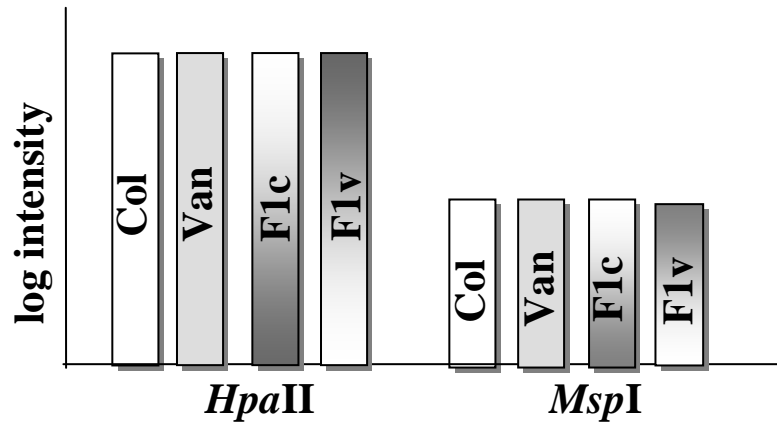

**Constitutive CG methylation;  
*HpaII* samples have greater  
signal**

**Enzyme effect -**

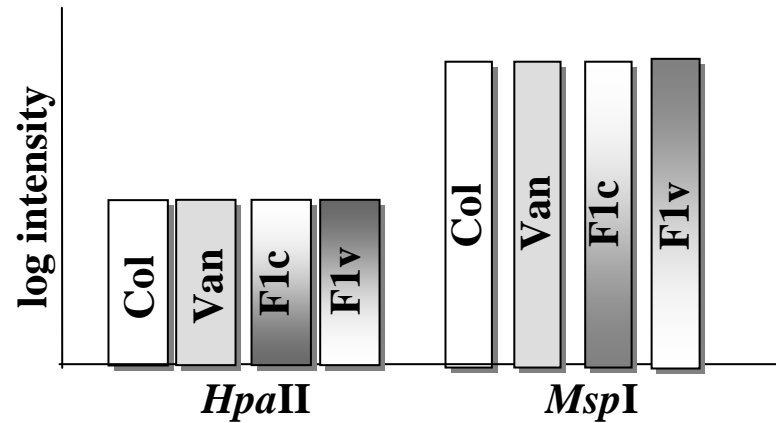

**Normalization; *MspI* samples  
have greater signal**

Enzyme effect describes intensity difference between *HpaII* and *MspI* enzyme treatment across genotypes.

**Additive x enzyme effect +**

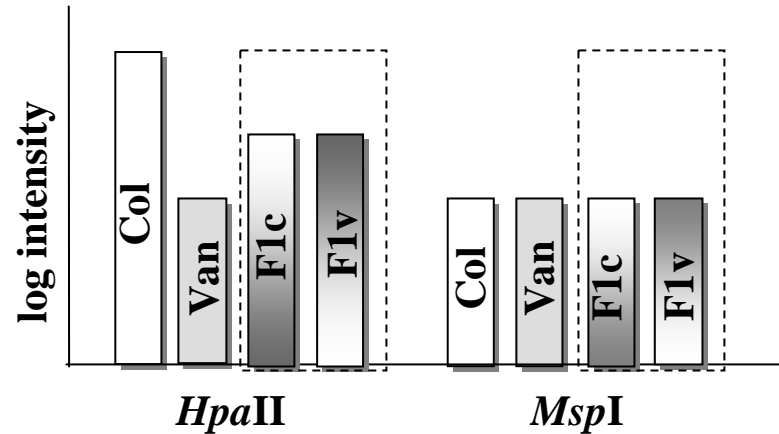

**Col-specific methylation**

**Additive x enzyme effect -**

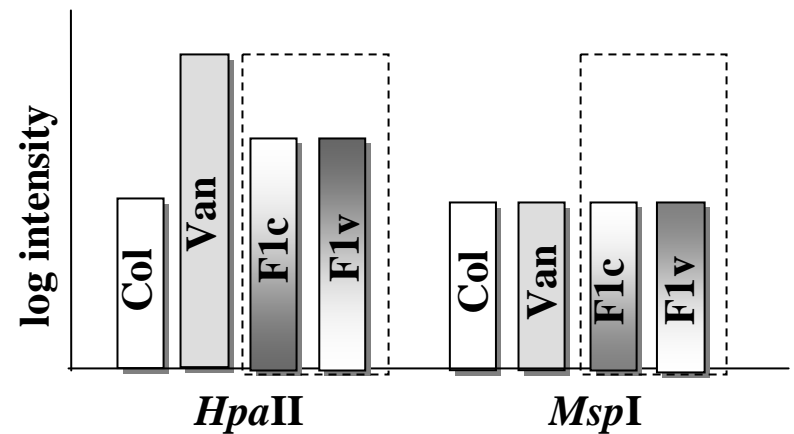

**Van-specific methylation**

Additive x enzyme effect describes differential enzyme sensitivity between parent strains.

### Dominant x enzyme effect +

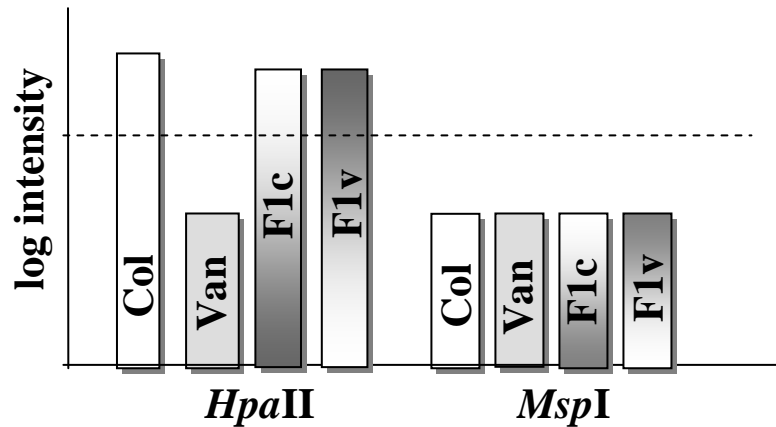

### Dominant x enzyme effect -

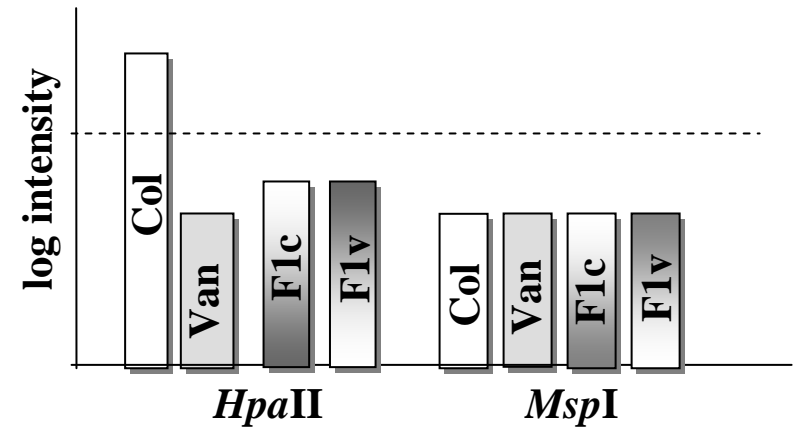

### Col-dominant methylation

### Van-dominant methylation

Dominant x enzyme effect describes differential enzyme sensitivity between mid-parent (average of parents; dashed line) and average of F1 hybrids.

**Maternal x enzyme effect +**

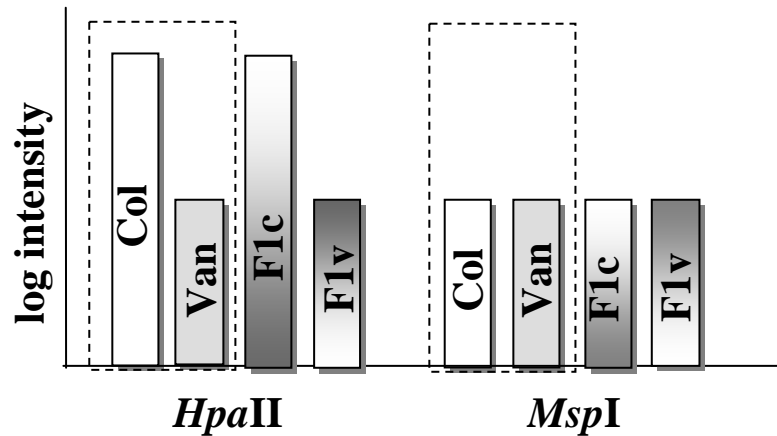

**Col-mother hybrid specific  
methylation**

**Maternal x enzyme effect -**

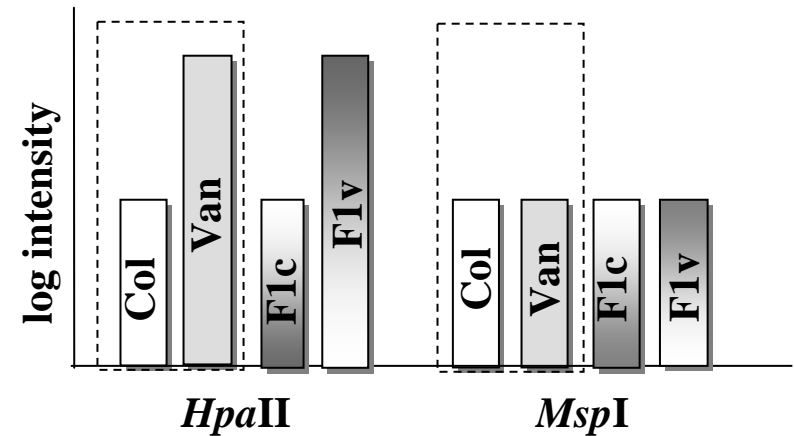

**Van-mother hybrid specific  
methylation**

Maternal x enzyme effect describes differential enzyme sensitivity between reciprocal F1 hybrids
