# Supplementary material for: Global Analysis of Genetic, Epigenetic and Transcriptional Polymorphisms in Arabidopsis thaliana Using Whole Genome Tiling Arrays
Source: PubMed Central journal article supplement (PMC2265482; doi:10.1371/journal.pgen.1000032), 2008-03-21

**A**

0% 100% Not analyzed:

004\_AT1G27320\_001

0 25 50 75 100 125 150 175 200 225 250 275 300 325 350 375

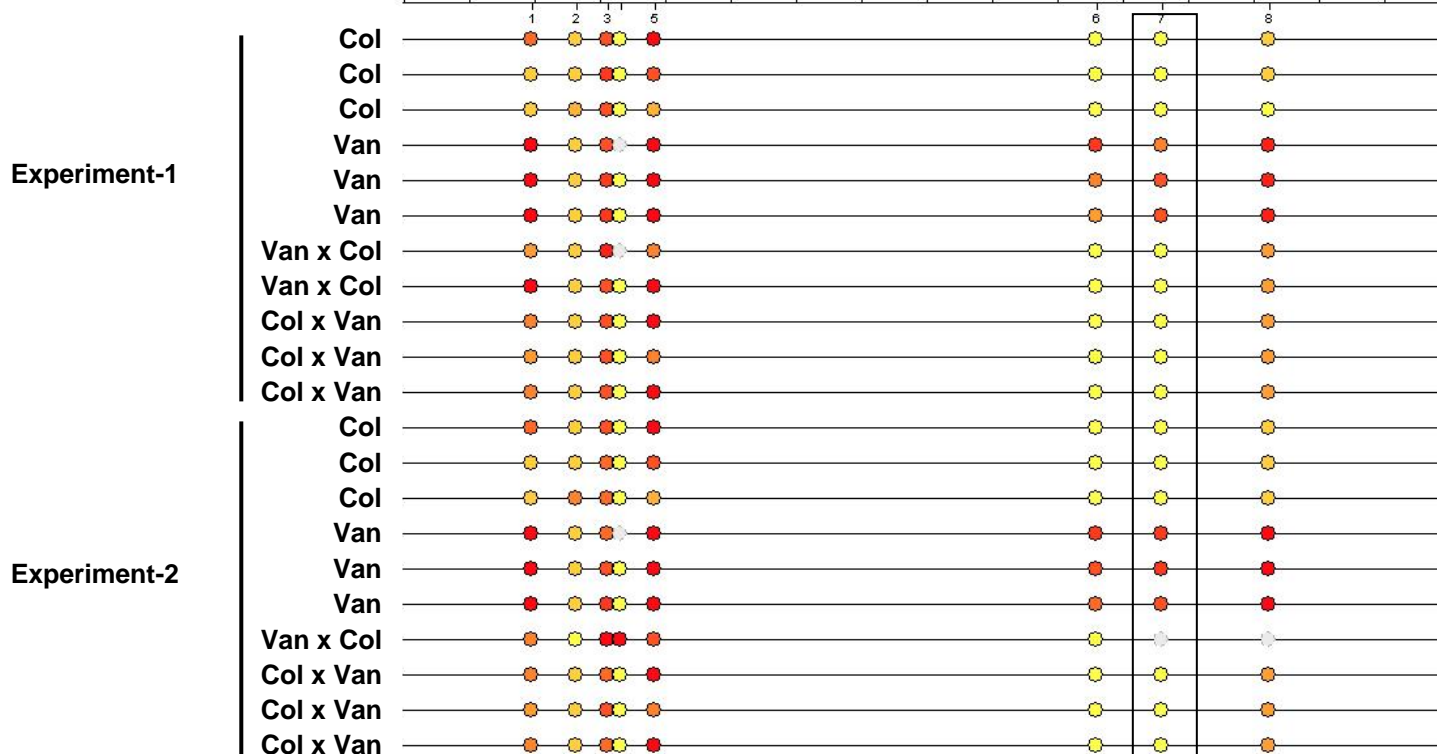AT1G27320  
(Chr1\_9491334)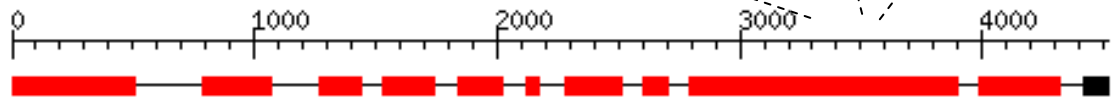

**B**

0% 100% Not analyzed:

013\_AT4G19020\_001

0 25 50 75 100 125 150 175 200 225 250 275 300

**Experiment-1**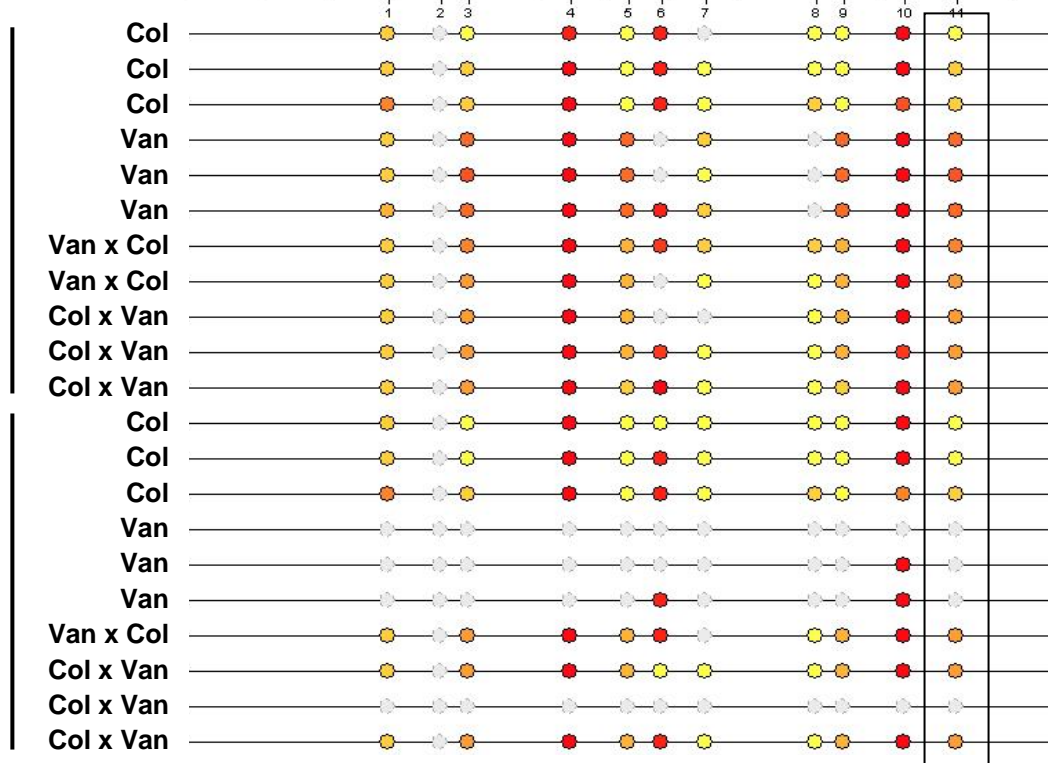**Experiment-2**

AT4G19020

(Chr4\_10420079)

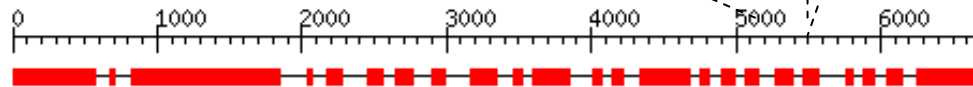

**C**

0% 100% Not analyzed:

006\_AT1G61000\_001

0 25 50 75 100 125 150 175 200 225 250 275 300 325

**Experiment-1**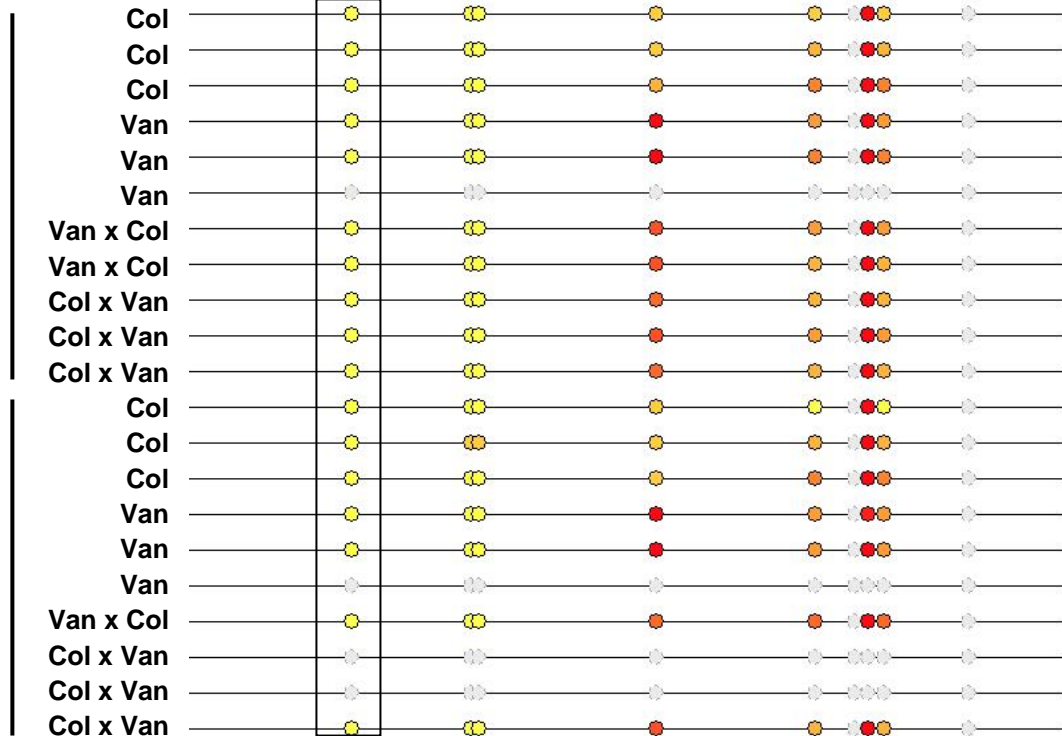**Experiment-2**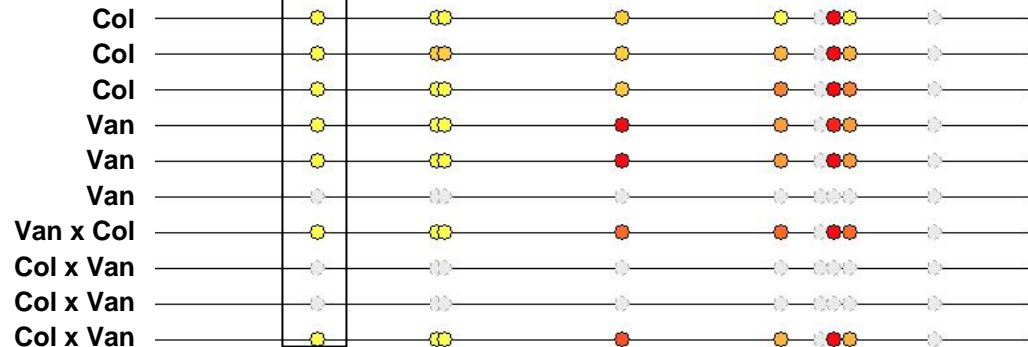

AT1G61000

(Chr1\_22476369)

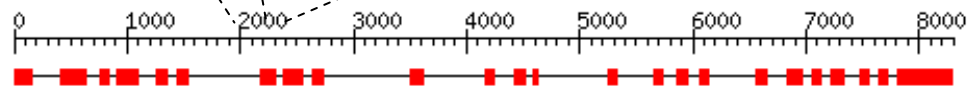

D

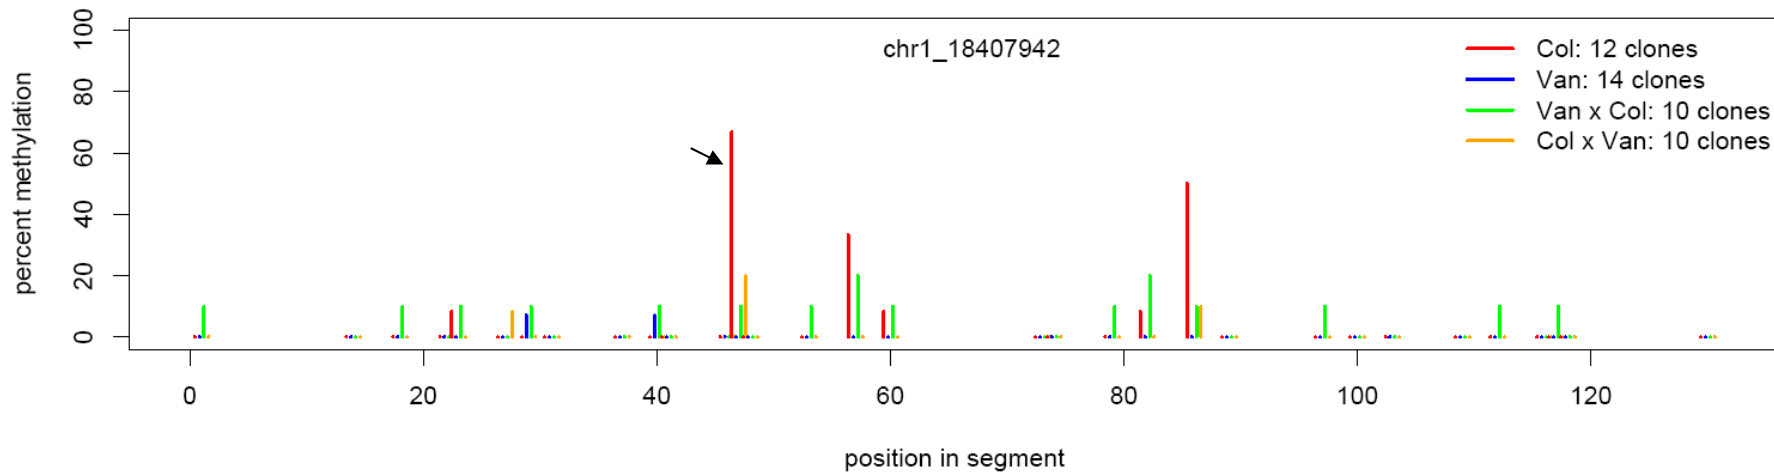

E

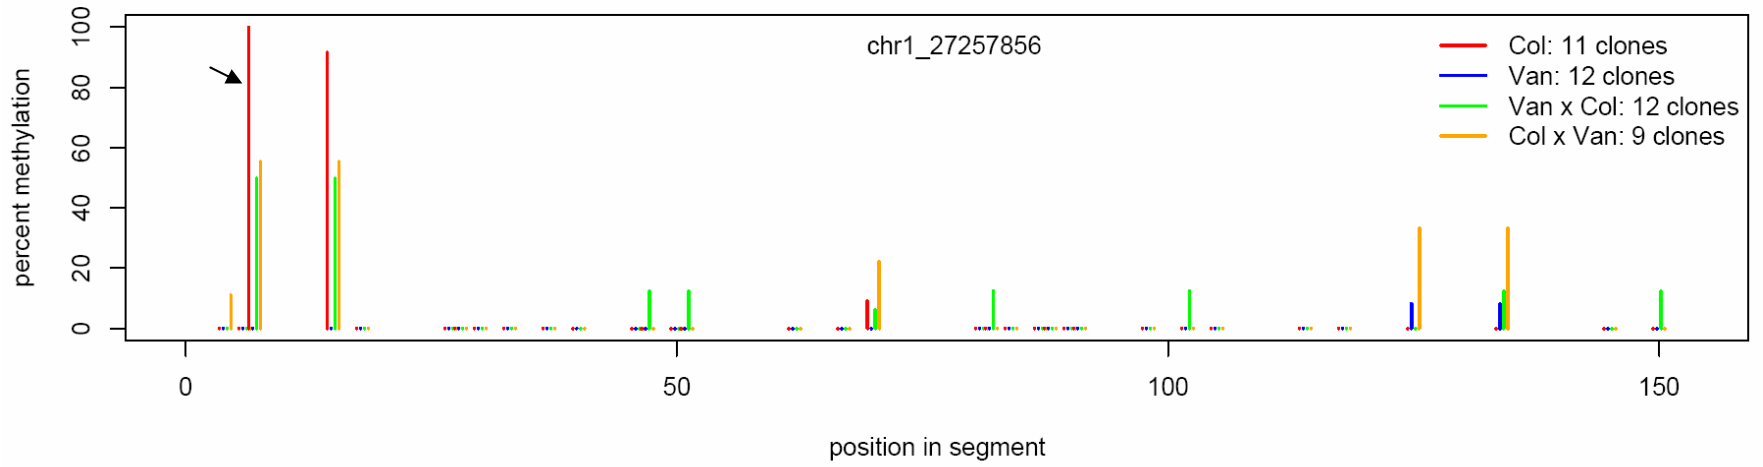

F

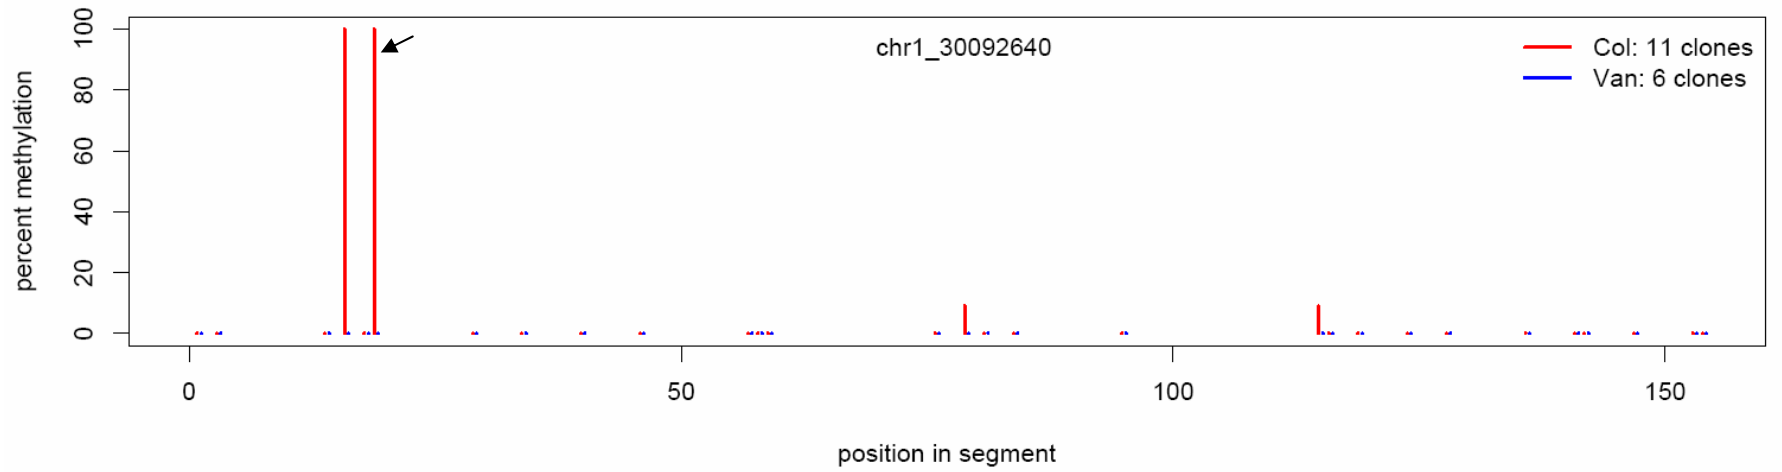

Supplement: pgen.1000032.s003.pdf [file pgen.1000032.s003.pdf]
