# Supplementary material for: Global Analysis of Genetic, Epigenetic and Transcriptional Polymorphisms in Arabidopsis thaliana Using Whole Genome Tiling Arrays
Source: PubMed Central journal article supplement (PMC2265482; doi:10.1371/journal.pgen.1000032), 2008-03-21

A

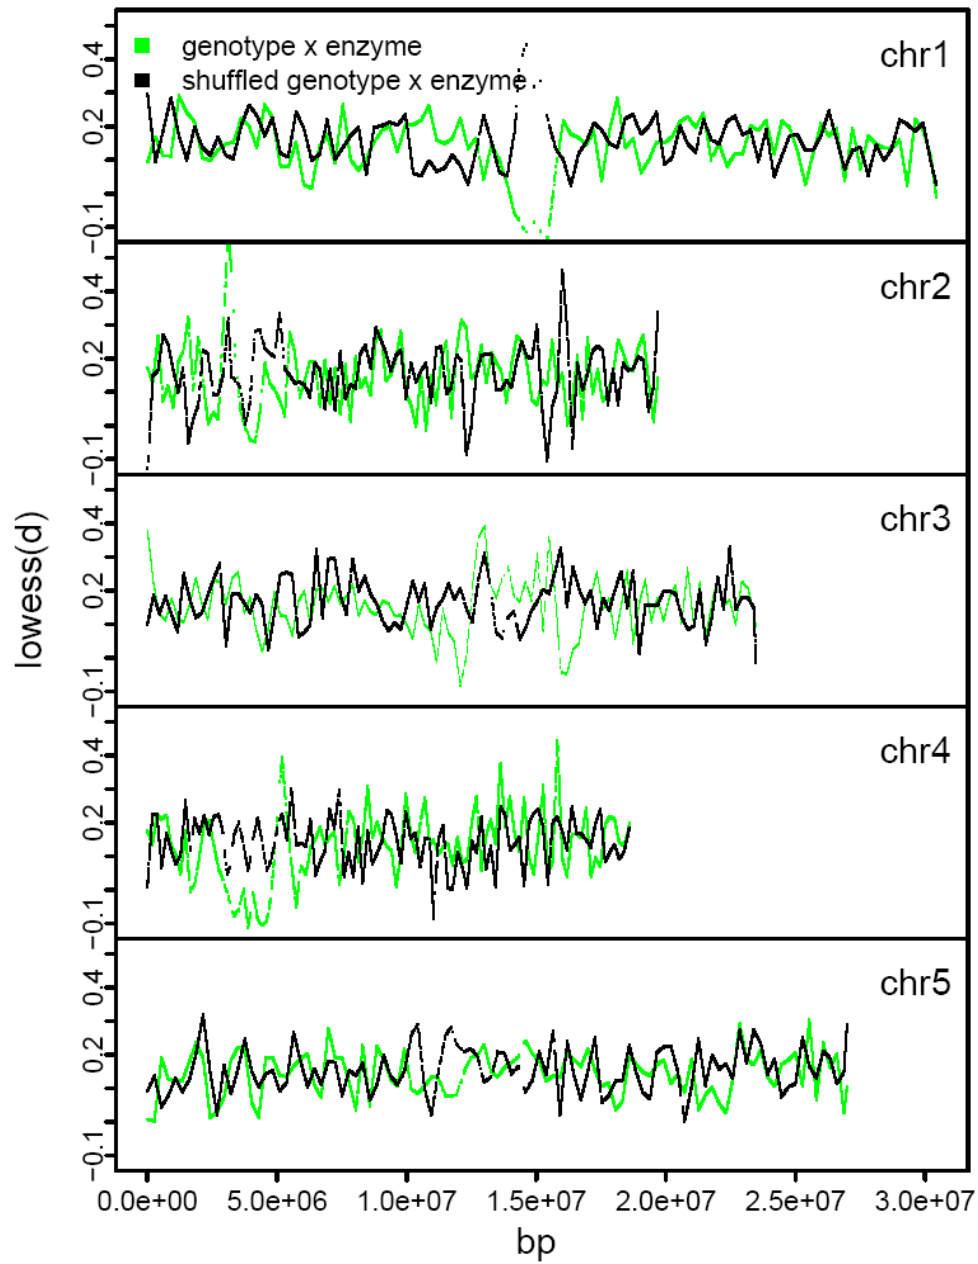

**B**

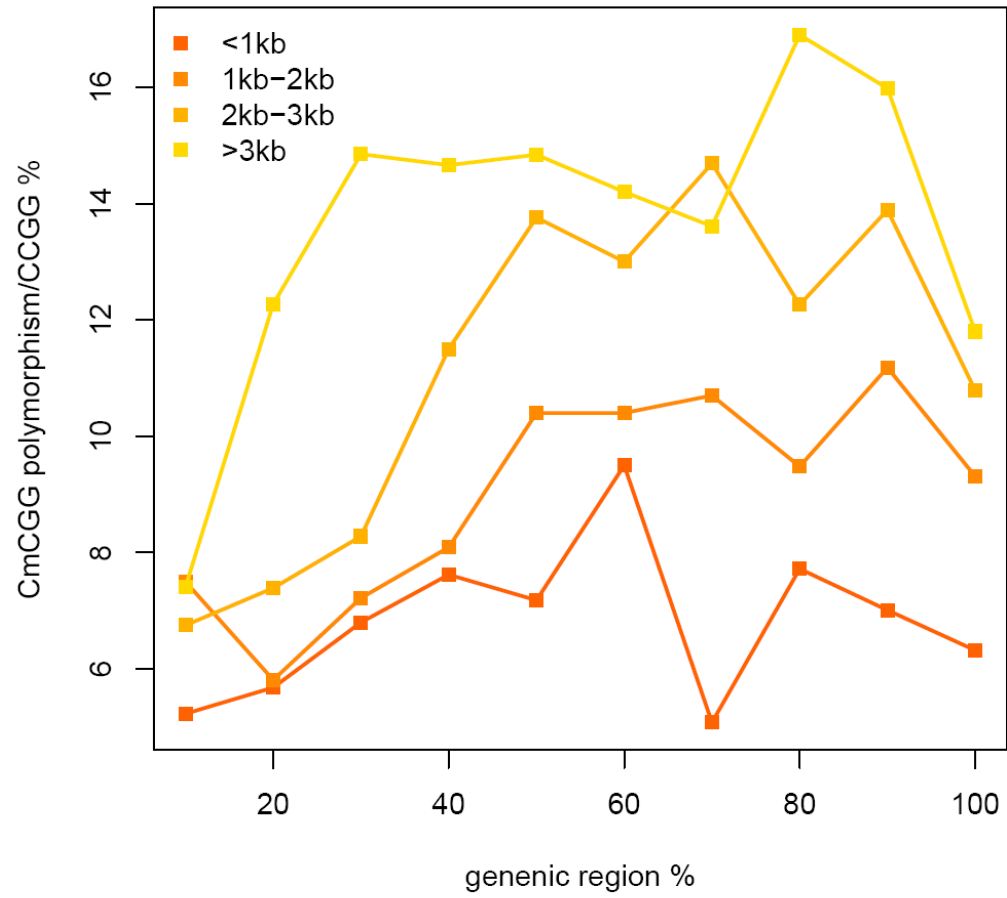

Supplement: pgen.1000032.s005.pdf [file pgen.1000032.s005.pdf]
